# Supplementary material for: Mixed-matrix membranes containing functionalized porous metal–organic polyhedrons for the effective separation of CO2–CH4 mixture
Source: Royal Society of Chemistry journal article supplement (doi:10.1039/c5cc00384a), 2015-01-01
Supplement: c5cc00384a1.pdf [file c5cc00384a1.pdf]

## Electronic Supporting Information

# Mixed-matrix membranes containing functionalized porous metal-organic nanoballs for effective separation of CO<sub>2</sub>/CH<sub>4</sub> mixture

5

Jing Ma,<sup>a</sup> Yunpan Ying,<sup>a</sup> Qingyuan Yang,<sup>a</sup> Yujie Ban,<sup>b</sup> Hongliang Huang,<sup>a</sup> Xiangyu Guo,<sup>a</sup> Yuanlong Xiao,<sup>a</sup>  
Dahuan Liu,<sup>\*a</sup> Yanshuo Li,<sup>b</sup> Weishen Yang,<sup>b</sup> Chongli Zhong<sup>\*a</sup>

## 1 Experimental Procedures

### 10 1.1 Synthesis of MOP-SO<sub>3</sub>Na

The sulfonic group functionalized nanoballs were synthesized according to the previously reported procedure<sup>S1</sup>. NaH<sub>2</sub>(5-SO<sub>3</sub>-1,3-BDC) (269.0 mg) in MeOH (8.0 mL) was mixed with a MeOH/DMA solution (15.0 mL, v:v = 1:1) of Cu<sub>2</sub>(OAc)<sub>4</sub>·H<sub>2</sub>O (200 mg) in a glass vial (50.0 mL) and stirred for 10 min at room temperature. Then, 5.0 mL of DMA was added into this solution and the vial was open and stood at room temperature. Homogeneous dark-blue block crystals were collected after 10 days and washed carefully with ethanol and 15 DMA.

### 1.2 Synthesis of MOP-OH

H<sub>2</sub>(5-OH-1,3-BDC)(365 mg) in MeOH (10.0 mL) was mixed with a MeOH (30.0 mL) solution of Cu<sub>2</sub>(OAc)<sub>4</sub>·H<sub>2</sub>O (400 mg) and stirred. Then, 10.0 mL DMA was added into this solution and the mixed solution was kept for 20 days at room temperature. At last the crystals were collected and washed with DMA and a little acetone.

### 20 1.3 Preparation of mixed-matrix membranes

Polysulfone (PSF) (kindly supplied by BASF) was degassed at 423 K overnight under vacuum to remove the adsorbed water. To prepare the MMMs, the required amount of MOP to achieve a given weight loading was dispersed in 5.0 mL of 1-methyl-2-pyrrolidinone. Then polymer were added to this suspension for several times, leading to a viscous solution. For comparison purposes, a membrane based on the neat polymer was prepared following an identical procedure, but without MOP incorporation. To prepare membranes, the homogeneous suspension was poured on a glass surface, we use casting machine to prepare membranes. To remove the solvent in the membranes, the glass was placed in a vacuum oven at 323 K for 2 days.

## 2 Characterization techniques and results

### 2.1 X-ray diffraction

X-ray diffraction analysis of the membranes were carried out on a SHIMADZU XRD-6000-X-ray diffractometer in reflection mode

using Cu K $\alpha$  radiation ( $\lambda = 1.5406 \text{ \AA}$ ), The  $2\theta$  range from  $3^\circ$  to  $55^\circ$  was scanned with a step size of  $0.05^\circ$ .

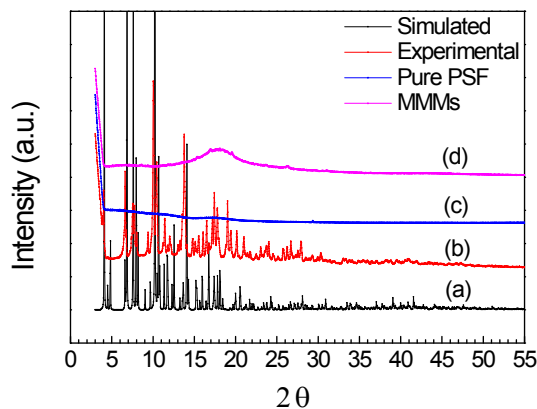

**Fig. S1** X-ray diffractions of (a) simulated MOP-SO<sub>3</sub>Na, (b) experimental MOP-SO<sub>3</sub>Na, (c) PSF membrane, and (d) MOP-SO<sub>3</sub>Na/PSF MMMs.

## 2.2 FTIR analysis

5 The FTIR analysis was performed on Nicolet 6700 FTIR spectrophotometer. Spectra were recorded in the  $4000\text{-}500 \text{ cm}^{-1}$  wavenumber range.

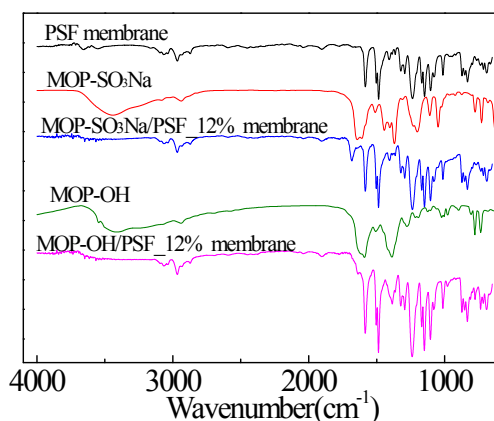

**Fig. S2** FTIR spectra of PSF membrane, MOP-SO<sub>3</sub>Na, MOP-SO<sub>3</sub>Na/PSF\_12% membrane, MOP-OH, MOP-OH/PSF\_12% membrane.

## 2.3 TGA analysis

10 The TGA analyses were performed at a heating rate of  $10 \text{ }^\circ\text{C}/\text{min}$  under nitrogen on a TGA 1/1100 SF instrument.

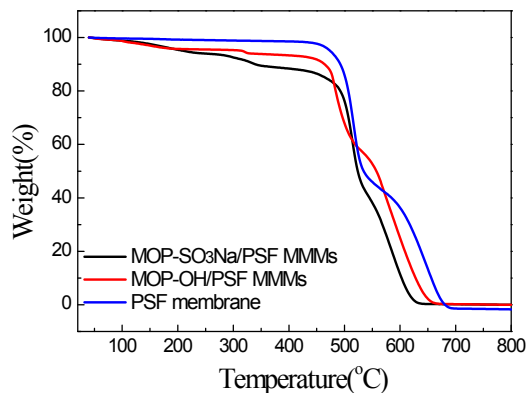

**Fig. S3** TGA plots of PSF membrane, MOP-SO<sub>3</sub>Na/PSF\_12% membrane, MOP-OH/PSF\_12% membrane.

## 2.4 XPS analysis

X-ray photoelectron spectroscopy data were obtained using an ESCALAB 250 electron spectrometer (Thermo Fisher Scientific company, US) .

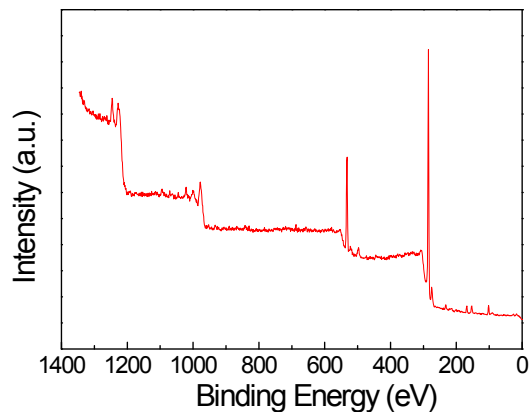

5

**Fig. S4** XPS plots of MOP-SO<sub>3</sub>Na/PSF\_12% membrane surface.

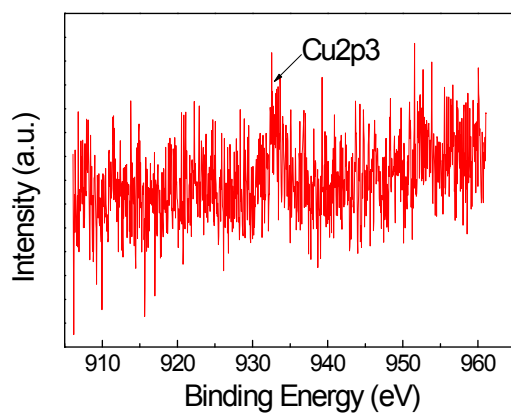

**Fig. S5** The enlarged XPS for Cu2p3 site.

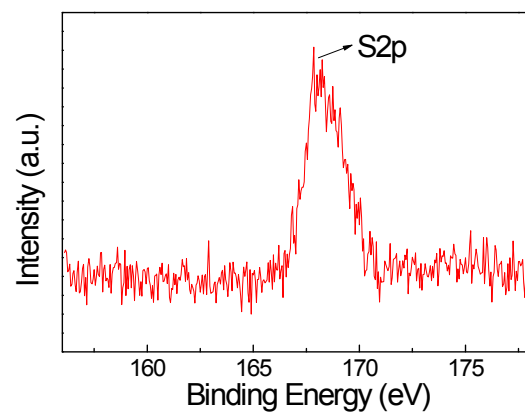

**Fig. S6** The enlarged XPS for S2p site.

10

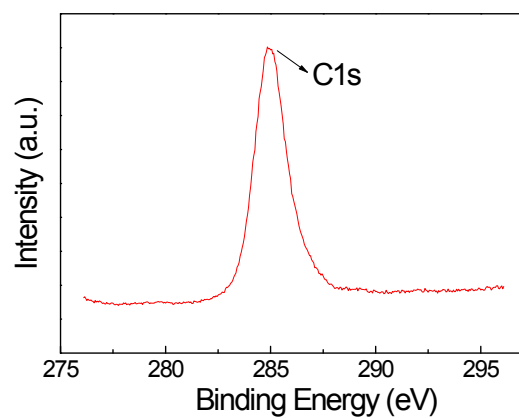

Fig. S7 The enlarged XPS for C1 site.

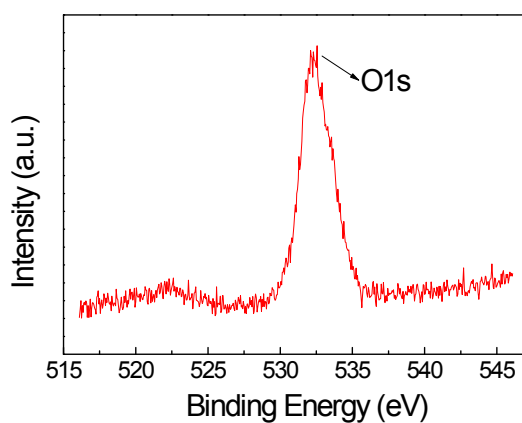

Fig. S8 The enlarged XPS for O1 site.

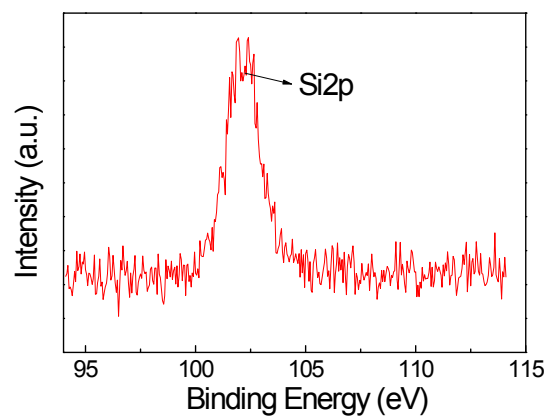

Fig. S9 The enlarged XPS for Si2p site.

## 2.5 Gas adsorption and desorption analysis

10 The experimental gas adsorption and desorption isothermals of CO<sub>2</sub>, CH<sub>4</sub> were measured at 298 K using gas adsorption equipment.

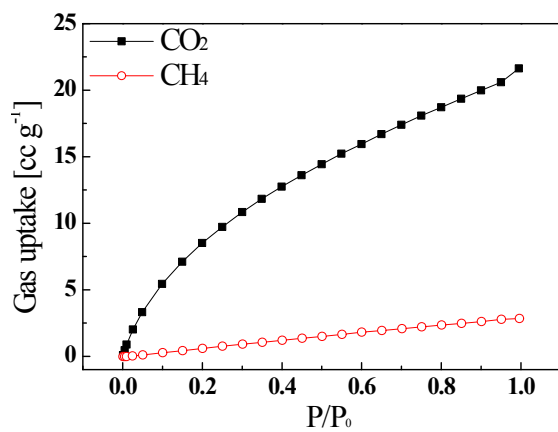

Fig. S10 Experimental adsorption and desorption isotherms of CO<sub>2</sub> and CH<sub>4</sub> in MOP-SO<sub>3</sub>Na at 298 K .

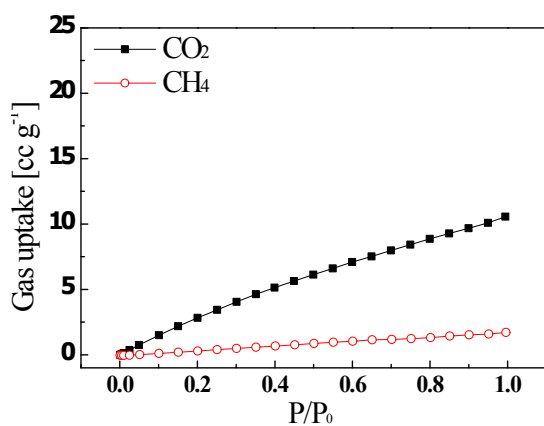

5 Fig. S11 Experimental adsorption and desorption isotherms of CO<sub>2</sub> and CH<sub>4</sub> in MOP-OH at 298 K.

## 2.6 SEM and EDS analysis

The membrane morphologies were observed via a scanning electron micrographs. (FEI, a XL-30 ESEM-FEG microscope). The gold-coated specimens were operated under 10-20 KV acceleration voltage.

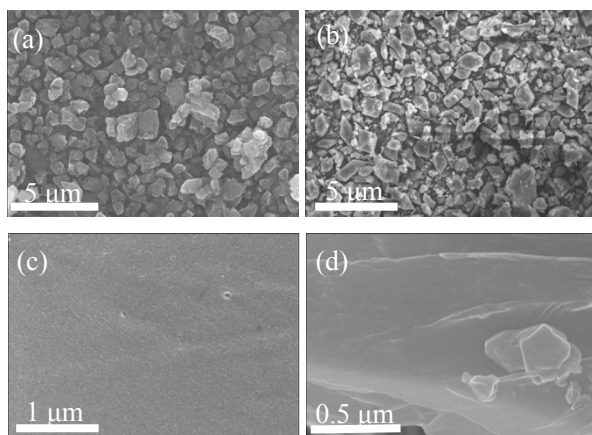

10

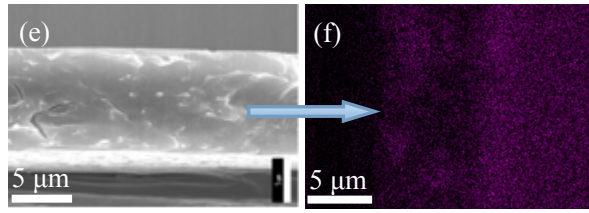

**Fig. S12** SEM micrographs of (a) MOP-SO<sub>3</sub>Na nanocrystals, (b) MOP-OH nanocrystals, (c) surface of MOP/PSF\_12 wt% membrane, (d,e) cross-section of MOP/PSF\_12 wt% membrane; (f) EDXS mapping of MOP/PSF\_12 wt% membrane (Cu signal: purple).

## 2.6 Membrane thickness measurement

5 Membrane thickness was determined using a digital micrometer with an accuracy of 1 μm. The measurement was performed at least at several different locations within each membrane and then averaged. In this work, the membranes' thickness we made using the casting machine is about 15 μm.

## 2.7 Gas permeation experiments

Gas permeability experiments were evaluated for CO<sub>2</sub> and CH<sub>4</sub> using a custom-built gas flux measuring apparatus (Fig. S3). The apparatus consists of a permeation module. This module exposes a membrane area of 3.14 cm<sup>2</sup> to the gas. We placed the membranes in the permeation module. Then an equimolar mixture of CO<sub>2</sub> and CH<sub>4</sub> was employed as feed. Helium was used as sweep gas for the permeate stream. Finally, the gas chromatograph at the permeation side was used to detect the constitute of the mixture online. Each membrane was fabricated and measured at least 3 times to ensure the reproducibility of the results.

Gas separation performance is defined by the separation factor ( $\alpha$ ) and the gas permeabilities ( $P$ ) of the individual components<sup>S11</sup>.

15 The permeability for the i-component ( $P_i$ ) was calculated as follows:

$$P_i = \frac{\Phi_{n,i} \cdot \delta}{\Delta P_i \cdot A} \quad (1)$$

Where  $\Phi_{n,i}$  denotes the molar flow rate of i-compound,  $\delta$  is the thickness of the membrane,  $\Delta P_i$  is the partial pressure difference of the i-component across the membrane and A is the membrane area. The SI unit for the permeability is mol s<sup>-1</sup> m<sup>-1</sup> Pa<sup>-1</sup>. However, here gas permeabilities are reported in the widely used non-SI unit Barrer, where 1 Barrer = 3.35 × 10<sup>-6</sup> mol m<sup>-1</sup> Pa<sup>-1</sup> s<sup>-1</sup>.

$$20 \quad P(\text{barrer}) = 10^{-10} \frac{\text{cm}^3(\text{STP}) \cdot \text{cm}}{\text{cm}^2 \cdot \text{s} \cdot \text{cmHg}} \quad (2)$$

The separation factor of mixed gas selectivity ( $\alpha$ ) was calculated as the ratio of the permeability of the more permeable compound (CO<sub>2</sub>) to the permeability of the less permeable compound (CH<sub>4</sub>).

$$\alpha = \frac{P_{\text{CO}_2}}{P_{\text{CH}_4}} \quad (3)$$

Fig. S13 The gas flux measuring apparatus.

## 2.7 Transient permeation curve

The gas separation performance was conducted before a period evacuation. When the system reaches a steady state, the data recording starts.

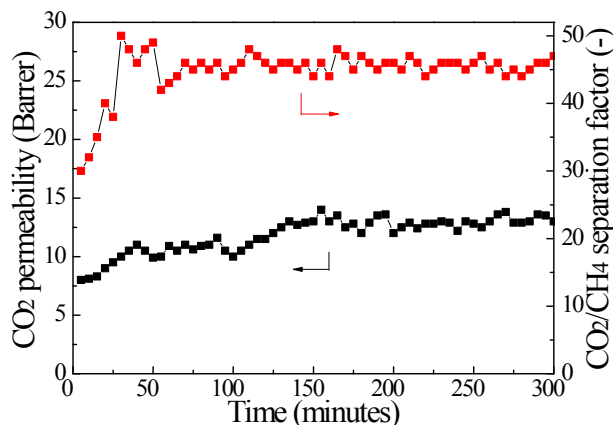

Fig. S14 Evolution of the CO<sub>2</sub> permeability (left-axis) and the CO<sub>2</sub>/CH<sub>4</sub> separation factor (right-axis) of MOP-SO<sub>3</sub>Na/PSF\_12% membrane (thickness of about 15 μm). Operation conditions: gas feedstock mixture of CO<sub>2</sub>:CH<sub>4</sub> = 1:1, T = 298 K, ΔP = 3 bar.

## 3 Comparison of gas permeability and selectivity of MMMs

10

Table S1 Comparison of gas permeability and selectivity of MMMs

| Filler  | Loading (wt %) | Operation conditions |       |          | P(CO <sub>2</sub> ) [Barrer] | S (CO <sub>2</sub> /CH <sub>4</sub> ) | Ref. |
|---------|----------------|----------------------|-------|----------|------------------------------|---------------------------------------|------|
|         |                | Analysis             | T (K) | ΔP (atm) |                              |                                       |      |
| MCM-41  | 10             |                      |       |          | 10.50                        | 17.92                                 |      |
|         | 20             | single gas           |       |          | 11.40                        | 18.91                                 | S2   |
|         | 30             |                      |       |          | 20.50                        | 19.52                                 |      |
| SWNT    | 5              |                      |       |          | 5.12                         | 18.82                                 |      |
|         | 10             | single gas           | 308   | 4        | 5.19                         | 18.41                                 | S3   |
| HKUST-1 | 15             |                      |       |          | 4.52                         | 16.09                                 |      |
|         | 5              | single gas           |       |          | 7.70                         | 21.50                                 | S4   |

|                             |    |                  |     |      |       |       |              |
|-----------------------------|----|------------------|-----|------|-------|-------|--------------|
|                             | 5  |                  |     |      | 7.70  | 24.84 |              |
| SiO <sub>2</sub>            | 10 | single gas       | 308 | 4.4  | 9.30  | 23.25 | S5           |
|                             | 15 |                  |     |      | 12.90 | 19.25 |              |
|                             | 20 |                  |     |      | 19.70 | 17.59 |              |
| MCM-48                      | 10 | single gas       | 308 | 4    | 8.45  | 25.47 | S6           |
|                             | 20 |                  |     |      | 18.21 | 23.58 |              |
| MIL-68(Al)                  | 4  | mixture<br>(1:1) | 308 | 2.75 | 4.70  | 32.20 | S7           |
|                             | 8  |                  |     |      | 5.30  | 31.70 |              |
| SNW-1                       | 12 | mixture<br>(1:1) | 298 | 3.5  | 22.40 | 35.00 | S8           |
|                             | 12 |                  |     |      | 25.04 | 27.00 |              |
| ZIF-8                       | 16 | mixture<br>(1:1) | 308 | 2    | 12.10 | 39.80 | S9           |
|                             | 8  |                  |     |      | 4.90  | 29.70 |              |
| NH <sub>2</sub> -MIL-53(Al) | 16 | mixture<br>(1:1) | 308 | 1    | 5.70  | 34.00 | S10          |
|                             | 25 |                  |     |      | 6.20  | 46.00 |              |
|                             | 40 |                  |     |      | 10.60 | 17.00 |              |
|                             | 25 |                  |     |      | 263   | 10    |              |
| Porous<br>polyhedrons       | 8  | mixture<br>(1:1) | 298 | 3    | 9.5   | 36.71 | This<br>work |
|                             | 12 |                  |     |      | 12.94 | 45.68 |              |
|                             | 18 |                  |     |      | 15.18 | 34.33 |              |

## References:

- S1 J. Li and H. Zhou, *Nat. Chem.*, 2010, **2**, 893-898.
- S2 B. D. Reid, F. A. Ruiz-Trevino, I. H. Musselman, K. J. Balkus and J. P. Ferraris, *Chem.Mater.*, 2001, **13**, 2366-2373.
- 5 S3 S. Kim, L. Chen, J. K. Johnson, E. Marand, *J. Membrane Sci.*, 2007,**294**,147-158.
- S4 A. Car, C. Stropnik, K.V. *Desalination*, 2006, **200**, 424-426.
- S5 J. Ahn, J. Chunga, I. Pinnau , M.D. Guiver, *J. Membrane Sci.*, 2008,**314**,123-133.
- S6 S. Kim, E. Marand, J. Ida , V. V. Guliants,*Chem.Mater.*,2006,**18**,1149-1155.
- S7 B. Seoane, V. Sebastián, C. Téllez and J. Coronas, *CrystEngComm*, 2013, **15**, 9483-9490.
- 10 S8 X. Gao, X. Zou, H. Ma, S. Meng and G. Zhu, *Adv. Mater.*, 2014, **26**, 3644-3648.
- S9 B. Zornoza, B. Seoane, J.M. Zamaro, C. Tellez, J. Coronas, *ChemPhysChem.*,2011,**12**, 2781-2785.
- S10 B. Zornoza, A. M.Joaristi,P. S.Crespo, C. Tellez,J. Coronas,J. Gascon and F. Kapteijn, *Chem. Commun.*, 2011, **47**, 9522-9524.
- S11 W. J. Koros, Y. H. Ma and T. Shimidzu, *Pure & Appl. Chem.*,1996, **68**, 1479-1489.
